# Supplementary material for: The intervertebral disc contains intrinsic circadian clocks that are regulated by age and cytokines and linked to degeneration
Source: PubMed Central journal article supplement (PMC5446006; doi:10.1136/annrheumdis-2016-209428), 2017-02-17
Supplement: annrheumdis-2016-209428supp003.pdf [file annrheumdis-2016-209428supp003.pdf]

Supplementary Table 1. List of rhythmic IVD genes with a ~24 hr period.

| ID                    | gene_name     | ADJ.P    | PERIOD | LAG |
|-----------------------|---------------|----------|--------|-----|
| ENSMUSG00000020917.11 | Acly          | 8.79E-06 | 24     | 4   |
| ENSMUSG00000038084.10 | Opa1          | 9.81E-05 | 24     | 4   |
| ENSMUSG00000020283.5  | Pex13         | 9.81E-05 | 24     | 4   |
| ENSMUSG00000009687.8  | Fxyd5         | 0.000265 | 24     | 12  |
| ENSMUSG00000027086.10 | Fastkd1       | 0.000265 | 24     | 0   |
| ENSMUSG00000046417.8  | Fam211a       | 0.000265 | 24     | 2   |
| ENSMUSG00000022053.7  | Ebf2          | 0.000265 | 24     | 5   |
| ENSMUSG00000047797.8  | Gjb1          | 0.000265 | 24     | 16  |
| ENSMUSG00000028989.3  | Angptl7       | 0.000645 | 24     | 20  |
| ENSMUSG00000025809.9  | Itgb1         | 0.000645 | 24     | 4   |
| ENSMUSG00000074766.4  | Ism1          | 0.000645 | 24     | 3   |
| ENSMUSG00000026643.10 | Nmt2          | 0.000645 | 24     | 4   |
| ENSMUSG00000019883.4  | Echdc1        | 0.000645 | 24     | 4   |
| ENSMUSG000000095512.1 | Gm17222       | 0.000645 | 24     | 4   |
| ENSMUSG00000047370.4  | Gm7367        | 0.000645 | 24     | 12  |
| ENSMUSG00000040605.6  | Bace2         | 0.000645 | 24     | 4   |
| ENSMUSG00000039956.2  | Mrap          | 0.000645 | 24     | 4   |
| ENSMUSG00000078234.5  | Klhdc7a       | 0.000645 | 24     | 4   |
| ENSMUSG00000073176.4  | Zfp449        | 0.000645 | 24     | 4   |
| ENSMUSG00000090305.1  | Gm5459        | 0.000645 | 24     | 16  |
| ENSMUSG00000029054.2  | Gabrd         | 0.000645 | 24     | 2   |
| ENSMUSG00000030972.5  | Acsm5         | 0.001042 | 24     | 4   |
| ENSMUSG00000021903.5  | Galnt15       | 0.00144  | 24     | 20  |
| ENSMUSG00000041607.10 | Mbp           | 0.00144  | 24     | 18  |
| ENSMUSG00000032010.8  | Usp2          | 0.00144  | 24     | 22  |
| ENSMUSG00000059824.4  | Dbp           | 0.00144  | 24     | 18  |
| ENSMUSG00000026922.7  | Agpat2        | 0.00144  | 24     | 4   |
| ENSMUSG00000041653.4  | Pnpla3        | 0.00144  | 24     | 4   |
| ENSMUSG00000026663.6  | Atf6          | 0.00144  | 24     | 4   |
| ENSMUSG00000029482.3  | Aacs          | 0.00144  | 24     | 4   |
| ENSMUSG00000090084.1  | Srpx          | 0.00144  | 24     | 4   |
| ENSMUSG00000039364.7  | Sectm1b       | 0.00144  | 24     | 16  |
| ENSMUSG00000051367.8  | Six1          | 0.00144  | 24     | 6   |
| ENSMUSG00000040370.7  | Lyrn5         | 0.00144  | 24     | 2   |
| ENSMUSG00000001700.9  | Gramd3        | 0.00144  | 24     | 4   |
| ENSMUSG00000031959.8  | Wdr59         | 0.00144  | 24     | 2   |
| ENSMUSG00000044645.7  | Gm7334        | 0.00144  | 24     | 2   |
| ENSMUSG00000025940.6  | Tmem70        | 0.00144  | 24     | 4   |
| ENSMUSG00000036225.8  | Kctd1         | 0.00144  | 24     | 4   |
| ENSMUSG00000021418.9  | Rpp40         | 0.00144  | 24     | 2   |
| ENSMUSG00000027663.6  | Zmat3         | 0.00144  | 24     | 4   |
| ENSMUSG00000031725.8  | Ces1f         | 0.00144  | 24     | 4   |
| ENSMUSG00000013523.7  | Bcas1         | 0.00144  | 24     | 16  |
| ENSMUSG00000073233.3  | Gm9144        | 0.00144  | 24     | 16  |
| ENSMUSG00000037016.7  | Frem2         | 0.00144  | 24     | 4   |
| ENSMUSG00000047473.8  | Zfp30         | 0.00144  | 24     | 2   |
| ENSMUSG00000025584.11 | Pde8a         | 0.00144  | 24     | 4   |
| ENSMUSG00000086432.1  | B430119L08Rik | 0.00144  | 24     | 6   |
| ENSMUSG00000079168.3  | Cd209g        | 0.00144  | 24     | 4   |

|                       |               |                 |    |    |
|-----------------------|---------------|-----------------|----|----|
| ENSMUSG00000074715.2  | Ccl28         | 0.00144         | 24 | 4  |
| ENSMUSG00000087235.1  | Gm4750        | 0.00144         | 24 | 16 |
| ENSMUSG00000044951.7  | Mylk4         | 0.002993        | 24 | 22 |
| ENSMUSG00000082476.1  | Gm12242       | 0.002993        | 24 | 15 |
| ENSMUSG00000076432.6  | Ywhaq         | 0.002993        | 24 | 4  |
| ENSMUSG00000063427.7  | Rps10-ps2     | 0.002993        | 24 | 16 |
| ENSMUSG00000040181.8  | Fmo1          | 0.002993        | 24 | 2  |
| ENSMUSG00000008540.5  | Mgst1         | 0.002993        | 24 | 4  |
| ENSMUSG00000021877.5  | Arf4          | 0.002993        | 24 | 4  |
| ENSMUSG00000029190.13 | D5Erttd579e   | 0.002993        | 24 | 2  |
| ENSMUSG00000036078.10 | Sigmar1       | 0.002993        | 24 | 4  |
| ENSMUSG00000022774.6  | Ncbp2         | 0.002993        | 24 | 2  |
| ENSMUSG00000027309.12 | 4930402H24Rik | 0.002993        | 24 | 4  |
| ENSMUSG00000022707.10 | Gbe1          | 0.002993        | 24 | 4  |
| ENSMUSG00000020777.10 | Acox1         | 0.002993        | 24 | 2  |
| ENSMUSG00000023832.7  | Acat2         | 0.002993        | 24 | 3  |
| ENSMUSG00000028567.8  | Txndc12       | 0.002993        | 24 | 4  |
| ENSMUSG00000023022.7  | Lima1         | 0.002993        | 24 | 3  |
| ENSMUSG00000039377.6  | Hlx           | 0.002993        | 24 | 12 |
| ENSMUSG00000041737.7  | Tmem45b       | 0.002993        | 24 | 4  |
| ENSMUSG00000020932.8  | Gfap          | 0.002993        | 24 | 16 |
| ENSMUSG00000021765.7  | Fst           | 0.002993        | 24 | 4  |
| ENSMUSG00000029208.10 | Guf1          | 0.002993        | 24 | 2  |
| ENSMUSG00000026749.5  | Nek6          | 0.002993        | 24 | 2  |
| ENSMUSG00000038517.9  | Tbkbp1        | 0.002993        | 24 | 14 |
| ENSMUSG00000005501.8  | Usp40         | 0.002993        | 24 | 1  |
| ENSMUSG00000020829.9  | Slc46a1       | 0.002993        | 24 | 8  |
| ENSMUSG00000094686.1  | Ccl21a        | 0.002993        | 24 | 6  |
| ENSMUSG00000073633.3  | Fbxo36        | 0.002993        | 24 | 5  |
| ENSMUSG00000027684.10 | Mecom         | 0.002993        | 24 | 4  |
| ENSMUSG00000052593.9  | Adam17        | 0.002993        | 24 | 4  |
| ENSMUSG00000040502.5  |               | Mar-09 0.002993 | 24 | 2  |
| ENSMUSG00000090659.2  | Zfp493        | 0.002993        | 24 | 1  |
| ENSMUSG00000040717.5  | Il17rd        | 0.002993        | 24 | 4  |
| ENSMUSG00000027792.5  | Bche          | 0.002993        | 24 | 4  |
| ENSMUSG00000054000.4  | Tusc1         | 0.002993        | 24 | 14 |
| ENSMUSG00000033182.6  | Kbtbd12       | 0.002993        | 24 | 4  |
| ENSMUSG00000037577.6  | Ephx3         | 0.002993        | 24 | 4  |
| ENSMUSG00000032517.9  | Mobp          | 0.002993        | 24 | 16 |
| ENSMUSG00000092746.2  | Gm22179       | 0.002993        | 24 | 6  |
| ENSMUSG00000028572.7  | Hook1         | 0.002993        | 24 | 18 |
| ENSMUSG00000029503.10 | P2rx2         | 0.002993        | 24 | 16 |
| ENSMUSG00000019890.3  | Nts           | 0.00442         | 24 | 4  |
| ENSMUSG00000029195.7  | Klb           | 0.00442         | 24 | 4  |
| ENSMUSG00000039099.7  | Wdr93         | 0.00442         | 24 | 6  |
| ENSMUSG00000037071.2  | Scd1          | 0.005847        | 24 | 4  |
| ENSMUSG00000025153.8  | Fasn          | 0.005847        | 24 | 4  |
| ENSMUSG00000021775.10 | Nr1d2         | 0.005847        | 24 | 19 |
| ENSMUSG00000030082.8  | Sec61a1       | 0.005847        | 24 | 4  |
| ENSMUSG00000021610.7  | Clptm1l       | 0.005847        | 24 | 4  |

|                       |               |          |    |    |
|-----------------------|---------------|----------|----|----|
| ENSMUSG00000022878.5  | Adipoq        | 0.005847 | 24 | 4  |
| ENSMUSG00000024286.7  | Ccny          | 0.005847 | 24 | 2  |
| ENSMUSG00000037470.8  | Uggt1         | 0.005847 | 24 | 4  |
| ENSMUSG00000009563.10 | Tor2a         | 0.005847 | 24 | 4  |
| ENSMUSG00000025007.7  | Aldh18a1      | 0.005847 | 24 | 6  |
| ENSMUSG00000022351.8  | Sqle          | 0.005847 | 24 | 2  |
| ENSMUSG00000028343.4  | Erp44         | 0.005847 | 24 | 4  |
| ENSMUSG00000060450.7  | Rnf14         | 0.005847 | 24 | 2  |
| ENSMUSG00000055116.7  | Arntl         | 0.005847 | 24 | 6  |
| ENSMUSG00000056973.6  | Ces1d         | 0.005847 | 24 | 2  |
| ENSMUSG00000047539.4  | Fbxo28        | 0.005847 | 24 | 2  |
| ENSMUSG00000028496.11 | Mllt3         | 0.005847 | 24 | 2  |
| ENSMUSG00000025981.7  | Coq10b        | 0.005847 | 24 | 22 |
| ENSMUSG00000069125.1  | Rps24-ps2     | 0.005847 | 24 | 16 |
| ENSMUSG00000031489.8  | Adrb3         | 0.005847 | 24 | 4  |
| ENSMUSG00000032724.5  | Abtb2         | 0.005847 | 24 | 4  |
| ENSMUSG00000001467.4  | Cyp51         | 0.005847 | 24 | 3  |
| ENSMUSG00000040564.7  | Apoc1         | 0.005847 | 24 | 4  |
| ENSMUSG00000003809.8  | Gcdh          | 0.005847 | 24 | 2  |
| ENSMUSG00000022131.2  | Gpr180        | 0.005847 | 24 | 2  |
| ENSMUSG00000004394.6  | Tmed4         | 0.005847 | 24 | 2  |
| ENSMUSG00000021666.10 | Gfm2          | 0.005847 | 24 | 0  |
| ENSMUSG00000041153.3  | Osgin2        | 0.005847 | 24 | 2  |
| ENSMUSG00000096795.1  | Zfp433        | 0.005847 | 24 | 4  |
| ENSMUSG00000015852.7  | Fcrls         | 0.005847 | 24 | 4  |
| ENSMUSG00000026181.11 | Ppm1f         | 0.005847 | 24 | 4  |
| ENSMUSG00000005069.6  | Pex5          | 0.005847 | 24 | 0  |
| ENSMUSG00000027341.4  | Tmem230       | 0.005847 | 24 | 4  |
| ENSMUSG00000030787.3  | Lyve1         | 0.005847 | 24 | 2  |
| ENSMUSG00000031358.11 | Msl3          | 0.005847 | 24 | 4  |
| ENSMUSG00000089682.3  | Bcl2l2        | 0.005847 | 24 | 2  |
| ENSMUSG00000029348.7  | Asphd2        | 0.005847 | 24 | 4  |
| ENSMUSG00000038180.5  | Spag4         | 0.005847 | 24 | 5  |
| ENSMUSG00000025102.8  | 3110040N11Rik | 0.005847 | 24 | 2  |
| ENSMUSG00000020038.9  | Cry1          | 0.005847 | 24 | 4  |
| ENSMUSG00000062480.5  | Acat3         | 0.005847 | 24 | 4  |
| ENSMUSG00000078923.4  | Ube2v1        | 0.005847 | 24 | 14 |
| ENSMUSG00000022074.5  | Tnfrsf10b     | 0.005847 | 24 | 6  |
| ENSMUSG00000027938.5  | Creb3l4       | 0.005847 | 24 | 4  |
| ENSMUSG00000097643.1  | A130051J06Rik | 0.005847 | 24 | 6  |
| ENSMUSG00000024334.8  | H2-Oa         | 0.005847 | 24 | 14 |
| ENSMUSG00000096935.1  | 1700113A16Rik | 0.005847 | 24 | 4  |
| ENSMUSG00000002578.9  | Ikzf4         | 0.005847 | 24 | 8  |
| ENSMUSG00000034460.8  | Six4          | 0.005847 | 24 | 4  |
| ENSMUSG00000031910.8  | Has3          | 0.005847 | 24 | 6  |
| ENSMUSG00000040177.9  | 2310057M21Rik | 0.005847 | 24 | 4  |
| ENSMUSG00000005268.14 | Prlr          | 0.005847 | 24 | 5  |
| ENSMUSG00000073427.3  | Gm4924        | 0.005847 | 24 | 2  |
| ENSMUSG00000095969.1  | Rnu1a1        | 0.005847 | 24 | 10 |
| ENSMUSG00000074403.2  | Hist2h3b      | 0.005847 | 24 | 11 |

|                       |               |          |    |    |
|-----------------------|---------------|----------|----|----|
| ENSMUSG00000043687.9  | 1190005I06Rik | 0.005847 | 24 | 4  |
| ENSMUSG00000069208.5  | Zfp825        | 0.005847 | 24 | 4  |
| ENSMUSG00000083320.1  | Gm13935       | 0.005847 | 24 | 20 |
| ENSMUSG00000053038.7  | Gm6180        | 0.005847 | 24 | 16 |
| ENSMUSG00000044916.4  | 1700029I15Rik | 0.005847 | 24 | 4  |
| ENSMUSG00000081497.1  | Gm15560       | 0.005847 | 24 | 16 |
| ENSMUSG00000041930.7  | Fam222a       | 0.005847 | 24 | 4  |
| ENSMUSG00000097855.1  | A930007I19Rik | 0.008333 | 24 | 6  |
| ENSMUSG00000040165.7  | Cd209c        | 0.008333 | 24 | 4  |
| ENSMUSG00000027762.5  | Sucnr1        | 0.008333 | 24 | 4  |
| ENSMUSG00000018865.8  | Sult4a1       | 0.008333 | 24 | 14 |
| ENSMUSG00000070436.5  | Serpinh1      | 0.01082  | 24 | 4  |
| ENSMUSG00000020585.4  | Laptm4a       | 0.01082  | 24 | 4  |
| ENSMUSG00000020889.11 | Nr1d1         | 0.01082  | 24 | 16 |
| ENSMUSG00000033022.7  | Cdo1          | 0.01082  | 24 | 4  |
| ENSMUSG00000024914.10 | Drap1         | 0.01082  | 24 | 16 |
| ENSMUSG00000032096.9  | Arcn1         | 0.01082  | 24 | 4  |
| ENSMUSG00000020532.12 | Acaca         | 0.01082  | 24 | 4  |
| ENSMUSG00000031701.5  | Dnaja2        | 0.01082  | 24 | 0  |
| ENSMUSG00000024538.7  | Ppic          | 0.01082  | 24 | 4  |
| ENSMUSG00000001494.6  | Sost          | 0.01082  | 24 | 14 |
| ENSMUSG00000046711.9  | Hmga1         | 0.01082  | 24 | 14 |
| ENSMUSG00000066632.2  | Pgk1-rs7      | 0.01082  | 24 | 0  |
| ENSMUSG00000032193.8  | Ldlr          | 0.01082  | 24 | 3  |
| ENSMUSG00000027879.3  | Sec22b        | 0.01082  | 24 | 2  |
| ENSMUSG00000061838.5  | Suclg2        | 0.01082  | 24 | 0  |
| ENSMUSG00000037379.4  | Spon2         | 0.01082  | 24 | 7  |
| ENSMUSG00000041891.9  | Lman1         | 0.01082  | 24 | 4  |
| ENSMUSG00000023827.2  | Agpat4        | 0.01082  | 24 | 6  |
| ENSMUSG00000029231.9  | Pdgfra        | 0.01082  | 24 | 4  |
| ENSMUSG00000019872.7  | Smpdl3a       | 0.01082  | 24 | 4  |
| ENSMUSG00000027088.4  | Phospho2      | 0.01082  | 24 | 2  |
| ENSMUSG00000031467.4  | Agpat5        | 0.01082  | 24 | 2  |
| ENSMUSG00000027742.8  | Cog6          | 0.01082  | 24 | 2  |
| ENSMUSG00000029009.11 | Mthfr         | 0.01082  | 24 | 4  |
| ENSMUSG00000063275.9  | Ptpla         | 0.01082  | 24 | 4  |
| ENSMUSG00000029685.9  | Asb15         | 0.01082  | 24 | 22 |
| ENSMUSG00000020471.5  | Pold2         | 0.01082  | 24 | 13 |
| ENSMUSG00000038416.8  | Cdc16         | 0.01082  | 24 | 2  |
| ENSMUSG00000035770.7  | Dync1li2      | 0.01082  | 24 | 2  |
| ENSMUSG00000029782.12 | Tmem209       | 0.01082  | 24 | 16 |
| ENSMUSG00000021916.9  | Glt8d1        | 0.01082  | 24 | 3  |
| ENSMUSG00000028955.3  | Vamp3         | 0.01082  | 24 | 2  |
| ENSMUSG00000024014.6  | Pim1          | 0.01082  | 24 | 14 |
| ENSMUSG00000034981.9  | Parm1         | 0.01082  | 24 | 4  |
| ENSMUSG00000026082.6  | Rev1          | 0.01082  | 24 | 22 |
| ENSMUSG00000031610.3  | Scrg1         | 0.01082  | 24 | 2  |
| ENSMUSG00000069631.8  | Strada        | 0.01082  | 24 | 12 |
| ENSMUSG00000027465.7  | Tbc1d20       | 0.01082  | 24 | 4  |
| ENSMUSG00000024150.5  | Mcfd2         | 0.01082  | 24 | 2  |

|                       |               |         |    |    |
|-----------------------|---------------|---------|----|----|
| ENSMUSG00000033453.7  | Adamts15      | 0.01082 | 24 | 4  |
| ENSMUSG00000024810.10 | Il33          | 0.01082 | 24 | 2  |
| ENSMUSG00000030545.8  | Pex11a        | 0.01082 | 24 | 2  |
| ENSMUSG00000031938.8  | 4931406C07Rik | 0.01082 | 24 | 2  |
| ENSMUSG00000021559.7  | Dapk1         | 0.01082 | 24 | 4  |
| ENSMUSG00000075486.3  | Commd6        | 0.01082 | 24 | 3  |
| ENSMUSG00000012422.8  | Tmem167       | 0.01082 | 24 | 4  |
| ENSMUSG00000074182.4  | Znhit6        | 0.01082 | 24 | 22 |
| ENSMUSG00000047554.7  | Tmem41b       | 0.01082 | 24 | 4  |
| ENSMUSG00000028293.8  | Slc35a1       | 0.01082 | 24 | 4  |
| ENSMUSG00000007777.3  | 0610009B22Rik | 0.01082 | 24 | 5  |
| ENSMUSG00000028256.10 | Odf2l         | 0.01082 | 24 | 0  |
| ENSMUSG00000075054.4  | Yae1d1        | 0.01082 | 24 | 3  |
| ENSMUSG00000039706.7  | Ldb2          | 0.01082 | 24 | 5  |
| ENSMUSG00000032018.7  | Sc5d          | 0.01082 | 24 | 3  |
| ENSMUSG00000034413.8  | Neurl1b       | 0.01082 | 24 | 4  |
| ENSMUSG00000019791.5  | Hint3         | 0.01082 | 24 | 2  |
| ENSMUSG00000097649.1  | Gm10561       | 0.01082 | 24 | 4  |
| ENSMUSG00000027555.8  | Car13         | 0.01082 | 24 | 4  |
| ENSMUSG00000046636.4  | Gm7729        | 0.01082 | 24 | 16 |
| ENSMUSG00000028990.7  | Lzic          | 0.01082 | 24 | 2  |
| ENSMUSG00000021567.8  | Nkd2          | 0.01082 | 24 | 2  |
| ENSMUSG00000070572.6  | Trmt112-ps2   | 0.01082 | 24 | 14 |
| ENSMUSG00000013646.11 | Sh3bp5l       | 0.01082 | 24 | 1  |
| ENSMUSG00000063439.6  | B9d2          | 0.01082 | 24 | 16 |
| ENSMUSG00000055917.8  | Zfp277        | 0.01082 | 24 | 4  |
| ENSMUSG00000039354.10 | Smarcal1      | 0.01082 | 24 | 2  |
| ENSMUSG00000060438.4  | Rps10-ps1     | 0.01082 | 24 | 16 |
| ENSMUSG00000089797.1  | Gm16118       | 0.01082 | 24 | 18 |
| ENSMUSG00000032346.7  | Ooep          | 0.01082 | 24 | 4  |
| ENSMUSG00000042340.5  | Ctf1          | 0.01082 | 24 | 2  |
| ENSMUSG00000073478.5  | D730003I15Rik | 0.01082 | 24 | 4  |
| ENSMUSG00000020000.7  | Moxd1         | 0.01082 | 24 | 4  |
| ENSMUSG00000040321.3  | Zfp770        | 0.01082 | 24 | 4  |
| ENSMUSG00000043913.8  | Ccdc60        | 0.01082 | 24 | 8  |
| ENSMUSG00000096544.1  | Gm4617        | 0.01082 | 24 | 15 |
| ENSMUSG00000082530.1  | Gm12168       | 0.01082 | 24 | 16 |
| ENSMUSG00000030336.8  | Cd27          | 0.01082 | 24 | 14 |
| ENSMUSG00000015437.4  | Gzmb          | 0.01082 | 24 | 13 |
| ENSMUSG00000065824.1  | Gm26315       | 0.01082 | 24 | 9  |
| ENSMUSG00000046733.7  | Gprc5a        | 0.01082 | 24 | 6  |
| ENSMUSG00000041617.4  | Ccdc74a       | 0.01082 | 24 | 8  |
| ENSMUSG00000016181.4  | Diexf         | 0.01082 | 24 | 4  |
| ENSMUSG00000091803.1  | Cox16         | 0.01082 | 24 | 2  |
| ENSMUSG00000020407.7  | Upp1          | 0.01082 | 24 | 6  |
| ENSMUSG00000055137.6  | 5033411D12Rik | 0.01082 | 24 | 4  |
| ENSMUSG00000079343.3  | Gm5077        | 0.01082 | 24 | 2  |
| ENSMUSG00000037940.9  | Inpp4b        | 0.01082 | 24 | 4  |
| ENSMUSG00000039865.7  | Slc44a3       | 0.01082 | 24 | 4  |
| ENSMUSG00000039278.10 | Pcsk1n        | 0.01082 | 24 | 16 |

|                       |               |          |    |    |
|-----------------------|---------------|----------|----|----|
| ENSMUSG00000096862.1  | Gm13301       | 0.01082  | 24 | 1  |
| ENSMUSG00000079484.6  | Phyhd1        | 0.01082  | 24 | 0  |
| ENSMUSG00000097828.1  | 6430562O15Rik | 0.01082  | 24 | 4  |
| ENSMUSG00000025475.11 | Gpr123        | 0.01082  | 24 | 7  |
| ENSMUSG00000082088.1  | Gm15753       | 0.01082  | 24 | 16 |
| ENSMUSG00000086869.2  | Gm7809        | 0.01082  | 24 | 0  |
| ENSMUSG00000083567.2  | Gm11451       | 0.01082  | 24 | 4  |
| ENSMUSG00000041878.3  | 8430432A02Rik | 0.01082  | 24 | 4  |
| ENSMUSG00000074345.3  | Tnfaip8l3     | 0.01082  | 24 | 4  |
| ENSMUSG00000033615.9  | Cplx1         | 0.01082  | 24 | 16 |
| ENSMUSG00000048186.8  | Bend7         | 0.01082  | 24 | 4  |
| ENSMUSG00000081194.1  | Gm8424        | 0.01082  | 24 | 4  |
| ENSMUSG00000066438.6  | Plekhd1       | 0.01082  | 24 | 16 |
| ENSMUSG00000070577.5  | Gm572         | 0.014955 | 24 | 4  |
| ENSMUSG00000017300.9  | Tnnc2         | 0.01909  | 24 | 18 |
| ENSMUSG00000028618.5  | Tmem59        | 0.01909  | 24 | 2  |
| ENSMUSG00000035493.9  | Tgfb1         | 0.01909  | 24 | 2  |
| ENSMUSG00000036309.8  | Skp1a         | 0.01909  | 24 | 1  |
| ENSMUSG00000026509.10 | Capn2         | 0.01909  | 24 | 2  |
| ENSMUSG00000022816.5  | Fstl1         | 0.01909  | 24 | 3  |
| ENSMUSG00000079017.3  | Ifi27l2a      | 0.01909  | 24 | 2  |
| ENSMUSG00000008575.11 | Nfib          | 0.01909  | 24 | 1  |
| ENSMUSG00000030168.7  | Adipor2       | 0.01909  | 24 | 4  |
| ENSMUSG00000027605.12 | Acss2         | 0.01909  | 24 | 4  |
| ENSMUSG00000030774.7  | Pak1          | 0.01909  | 24 | 20 |
| ENSMUSG00000052837.5  | Junb          | 0.01909  | 24 | 13 |
| ENSMUSG00000019370.10 | Calm3         | 0.01909  | 24 | 16 |
| ENSMUSG00000022048.8  | Dpysl2        | 0.01909  | 24 | 2  |
| ENSMUSG00000027668.7  | Mfn1          | 0.01909  | 24 | 0  |
| ENSMUSG00000020893.11 | Per1          | 0.01909  | 24 | 18 |
| ENSMUSG00000030062.6  | Rpn1          | 0.01909  | 24 | 0  |
| ENSMUSG00000020817.10 | Rabep1        | 0.01909  | 24 | 2  |
| ENSMUSG00000022940.10 | Pigp          | 0.01909  | 24 | 1  |
| ENSMUSG00000020523.8  | Fam114a2      | 0.01909  | 24 | 2  |
| ENSMUSG00000042688.10 | Mapk6         | 0.01909  | 24 | 9  |
| ENSMUSG00000029390.7  | Tmed2         | 0.01909  | 24 | 4  |
| ENSMUSG00000081604.4  | Gm11518       | 0.01909  | 24 | 14 |
| ENSMUSG00000083899.2  | Gm12346       | 0.01909  | 24 | 0  |
| ENSMUSG00000052428.5  | Tmco1         | 0.01909  | 24 | 4  |
| ENSMUSG00000027131.3  | Emc4          | 0.01909  | 24 | 3  |
| ENSMUSG00000061731.3  | Ext1          | 0.01909  | 24 | 4  |
| ENSMUSG00000024370.10 | Cdc23         | 0.01909  | 24 | 4  |
| ENSMUSG00000045294.10 | Insig1        | 0.01909  | 24 | 2  |
| ENSMUSG00000044221.8  | Grsf1         | 0.01909  | 24 | 1  |
| ENSMUSG00000032998.10 | Foxj3         | 0.01909  | 24 | 2  |
| ENSMUSG00000071984.4  | Fndc1         | 0.01909  | 24 | 4  |
| ENSMUSG00000026585.7  | Kifap3        | 0.01909  | 24 | 2  |
| ENSMUSG00000025911.8  | Adhfe1        | 0.01909  | 24 | 4  |
| ENSMUSG00000016494.3  | Cd34          | 0.01909  | 24 | 2  |
| ENSMUSG00000030298.4  | Sec13         | 0.01909  | 24 | 4  |

|                       |               |         |    |    |
|-----------------------|---------------|---------|----|----|
| ENSMUSG00000022436.9  | Sh3bp1        | 0.01909 | 24 | 14 |
| ENSMUSG00000021417.8  | Eci2          | 0.01909 | 24 | 4  |
| ENSMUSG00000040928.9  | S100pbp       | 0.01909 | 24 | 0  |
| ENSMUSG00000029864.5  | Gstk1         | 0.01909 | 24 | 4  |
| ENSMUSG0000001962.8   | Fam50a        | 0.01909 | 24 | 21 |
| ENSMUSG00000005078.10 | Jkamp         | 0.01909 | 24 | 4  |
| ENSMUSG00000014402.8  | Tsg101        | 0.01909 | 24 | 0  |
| ENSMUSG00000031799.9  | Tpm4          | 0.01909 | 24 | 4  |
| ENSMUSG00000021756.6  | Il6st         | 0.01909 | 24 | 2  |
| ENSMUSG0000000194.7   | Gpr107        | 0.01909 | 24 | 2  |
| ENSMUSG000000055866.8 | Per2          | 0.01909 | 24 | 22 |
| ENSMUSG00000036940.9  | Kdm1a         | 0.01909 | 24 | 2  |
| ENSMUSG00000036099.10 | Vezt          | 0.01909 | 24 | 11 |
| ENSMUSG00000034893.7  | Cog3          | 0.01909 | 24 | 0  |
| ENSMUSG00000029474.6  | Rnf34         | 0.01909 | 24 | 4  |
| ENSMUSG00000024645.4  | Timm21        | 0.01909 | 24 | 1  |
| ENSMUSG00000051232.7  | Tmem199       | 0.01909 | 24 | 4  |
| ENSMUSG00000029554.9  | Mad1l1        | 0.01909 | 24 | 16 |
| ENSMUSG00000066233.5  | Tmem42        | 0.01909 | 24 | 2  |
| ENSMUSG00000027217.7  | Tspan18       | 0.01909 | 24 | 4  |
| ENSMUSG00000057789.7  | Bak1          | 0.01909 | 24 | 12 |
| ENSMUSG00000023992.8  | Trem2         | 0.01909 | 24 | 16 |
| ENSMUSG00000036513.9  | Commd2        | 0.01909 | 24 | 22 |
| ENSMUSG00000032030.10 | Cul5          | 0.01909 | 24 | 4  |
| ENSMUSG00000038936.7  | Sccpdh        | 0.01909 | 24 | 2  |
| ENSMUSG00000029759.3  | Pon3          | 0.01909 | 24 | 3  |
| ENSMUSG00000043635.6  | Adamts3       | 0.01909 | 24 | 4  |
| ENSMUSG00000040158.6  | Tax1bp3       | 0.01909 | 24 | 2  |
| ENSMUSG0000001300.9   | Efnb2         | 0.01909 | 24 | 4  |
| ENSMUSG00000026271.9  | Gpr35         | 0.01909 | 24 | 10 |
| ENSMUSG00000037001.10 | Zfp39         | 0.01909 | 24 | 12 |
| ENSMUSG00000049892.7  | Rasd1         | 0.01909 | 24 | 4  |
| ENSMUSG00000028369.9  | Svep1         | 0.01909 | 24 | 2  |
| ENSMUSG00000020653.5  | Klf11         | 0.01909 | 24 | 14 |
| ENSMUSG00000046731.3  | Kctd11        | 0.01909 | 24 | 5  |
| ENSMUSG00000035890.8  | Rnf126        | 0.01909 | 24 | 8  |
| ENSMUSG00000058729.7  | Lin9          | 0.01909 | 24 | 17 |
| ENSMUSG00000015971.4  | Actr8         | 0.01909 | 24 | 2  |
| ENSMUSG0000004356.7   | Utp20         | 0.01909 | 24 | 0  |
| ENSMUSG00000027313.3  | Chac1         | 0.01909 | 24 | 16 |
| ENSMUSG00000026482.7  | Rgl1          | 0.01909 | 24 | 2  |
| ENSMUSG00000036995.7  | Asap3         | 0.01909 | 24 | 4  |
| ENSMUSG00000086316.1  | 2210013O21Rik | 0.01909 | 24 | 4  |
| ENSMUSG00000069378.7  | Prdm6         | 0.01909 | 24 | 6  |
| ENSMUSG00000037669.8  | 1110057K04Rik | 0.01909 | 24 | 2  |
| ENSMUSG00000031533.3  | Mrps31        | 0.01909 | 24 | 4  |
| ENSMUSG00000025507.7  | Lrdd          | 0.01909 | 24 | 14 |
| ENSMUSG00000069255.6  | Dusp22        | 0.01909 | 24 | 4  |
| ENSMUSG00000030317.6  | Timp4         | 0.01909 | 24 | 22 |
| ENSMUSG00000007476.12 | Lrrc8a        | 0.01909 | 24 | 4  |

|                       |               |         |    |    |
|-----------------------|---------------|---------|----|----|
| ENSMUSG00000063889.10 | Crem          | 0.01909 | 24 | 2  |
| ENSMUSG00000037296.6  | Lsm1          | 0.01909 | 24 | 4  |
| ENSMUSG00000047182.5  | Irs3          | 0.01909 | 24 | 4  |
| ENSMUSG00000036819.8  | Jmjd4         | 0.01909 | 24 | 11 |
| ENSMUSG00000021339.3  | Mrs2          | 0.01909 | 24 | 2  |
| ENSMUSG00000020178.5  | Adora2a       | 0.01909 | 24 | 6  |
| ENSMUSG00000004500.8  | Zfp324        | 0.01909 | 24 | 2  |
| ENSMUSG00000034748.10 | Sirt6         | 0.01909 | 24 | 10 |
| ENSMUSG00000039033.5  | Tasp1         | 0.01909 | 24 | 0  |
| ENSMUSG00000033581.10 | Igf2bp2       | 0.01909 | 24 | 4  |
| ENSMUSG00000078897.4  | Gm4724        | 0.01909 | 24 | 2  |
| ENSMUSG00000007805.3  | Twist2        | 0.01909 | 24 | 6  |
| ENSMUSG00000039512.11 | Uhrf1bp1      | 0.01909 | 24 | 4  |
| ENSMUSG00000020354.9  | Sgcd          | 0.01909 | 24 | 3  |
| ENSMUSG00000097080.1  | 1700086O06Rik | 0.01909 | 24 | 12 |
| ENSMUSG00000030935.9  | Acsn3         | 0.01909 | 24 | 4  |
| ENSMUSG00000033825.9  | Tpsb2         | 0.01909 | 24 | 4  |
| ENSMUSG00000078249.4  | Hmga1-rs1     | 0.01909 | 24 | 14 |
| ENSMUSG00000049916.9  | 2610318N02Rik | 0.01909 | 24 | 14 |
| ENSMUSG00000053870.6  | Fpgt          | 0.01909 | 24 | 4  |
| ENSMUSG00000020151.10 | Ptpr          | 0.01909 | 24 | 3  |
| ENSMUSG00000081121.1  | Gm12791       | 0.01909 | 24 | 17 |
| ENSMUSG00000003062.8  | Stard3nl      | 0.01909 | 24 | 0  |
| ENSMUSG00000025221.9  | Kcnp2         | 0.01909 | 24 | 4  |
| ENSMUSG00000022206.6  | Npr3          | 0.01909 | 24 | 2  |
| ENSMUSG00000041762.10 | Gpr155        | 0.01909 | 24 | 1  |
| ENSMUSG00000057895.5  | Zfp105        | 0.01909 | 24 | 1  |
| ENSMUSG00000026048.10 | Ercc5         | 0.01909 | 24 | 0  |
| ENSMUSG00000074657.4  | Kif5a         | 0.01909 | 24 | 16 |
| ENSMUSG00000090215.2  | Trim34b       | 0.01909 | 24 | 15 |
| ENSMUSG00000043943.8  | Naalad2       | 0.01909 | 24 | 4  |
| ENSMUSG00000041020.8  | Map7d2        | 0.01909 | 24 | 11 |
| ENSMUSG00000050994.13 | Adgb          | 0.01909 | 24 | 16 |
| ENSMUSG00000030325.10 | Klrb1c        | 0.01909 | 24 | 16 |
| ENSMUSG00000036634.9  | Mag           | 0.01909 | 24 | 16 |
| ENSMUSG00000056592.8  | Zfp658        | 0.01909 | 24 | 0  |
| ENSMUSG00000028145.7  | Them4         | 0.01909 | 24 | 4  |
| ENSMUSG00000027001.4  | Dusp19        | 0.01909 | 24 | 3  |
| ENSMUSG00000086877.1  | A230072C01Rik | 0.01909 | 24 | 4  |
| ENSMUSG00000097124.1  | A530020G20Rik | 0.01909 | 24 | 4  |
| ENSMUSG00000078349.2  | AW011738      | 0.01909 | 24 | 16 |
| ENSMUSG00000031428.5  | Zcchc18       | 0.01909 | 24 | 18 |
| ENSMUSG00000044033.10 | Ccdc141       | 0.01909 | 24 | 4  |
| ENSMUSG00000041945.6  | Mfsd9         | 0.01909 | 24 | 4  |
| ENSMUSG00000042389.7  | Tsen2         | 0.01909 | 24 | 4  |
| ENSMUSG00000011751.10 | Sptbn4        | 0.01909 | 24 | 17 |
| ENSMUSG00000032556.9  | Bfsp2         | 0.01909 | 24 | 16 |
| ENSMUSG00000012187.7  | Mogat1        | 0.01909 | 24 | 4  |
| ENSMUSG00000092124.1  | B930094E09Rik | 0.01909 | 24 | 4  |
| ENSMUSG00000024827.9  | Gldc          | 0.01909 | 24 | 21 |



|                       |               |                 |    |    |
|-----------------------|---------------|-----------------|----|----|
| ENSMUSG00000081895.3  | Gm10294       | 0.01909         | 24 | 20 |
| ENSMUSG00000083859.1  | Gm12003       | 0.01909         | 24 | 16 |
| ENSMUSG00000059511.3  | Gm20563       | 0.01909         | 24 | 4  |
| ENSMUSG00000036095.10 | Dgkb          | 0.01909         | 24 | 3  |
| ENSMUSG00000055188.6  | 2900002K06Rik | 0.01909         | 24 | 5  |
| ENSMUSG00000087569.1  | Gm8464        | 0.01909         | 24 | 16 |
| ENSMUSG00000086670.1  | Gm13194       | 0.01909         | 24 | 16 |
| ENSMUSG00000061988.2  | Rpl10a-ps2    | 0.01909         | 24 | 16 |
| ENSMUSG00000031297.8  | Slc7a3        | 0.01909         | 24 | 1  |
| ENSMUSG00000049832.5  | Gm9840        | 0.01909         | 24 | 18 |
| ENSMUSG00000083668.1  | Gm5648        | 0.01909         | 24 | 16 |
| ENSMUSG00000035983.4  | Gm7008        | 0.01909         | 24 | 16 |
| ENSMUSG00000084941.1  | Gm11944       | 0.01909         | 24 | 13 |
| ENSMUSG00000033765.4  | Calm4         | 0.01909         | 24 | 22 |
| ENSMUSG00000040035.8  | Disp2         | 0.01909         | 24 | 18 |
| ENSMUSG00000034739.11 | Mfrp          | 0.025686        | 24 | 4  |
| ENSMUSG00000044948.10 | Wdr96         | 0.025686        | 24 | 6  |
| ENSMUSG00000049699.3  | Ucn2          | 0.025686        | 24 | 16 |
| ENSMUSG00000085893.1  | Gm12091       | 0.032282        | 24 | 12 |
| ENSMUSG00000022389.8  | Tef           | 0.032282        | 24 | 21 |
| ENSMUSG00000079037.3  | Prnp          | 0.032282        | 24 | 3  |
| ENSMUSG00000081992.1  | Gm13408       | 0.032282        | 24 | 16 |
| ENSMUSG00000021794.9  | Glud1         | 0.032282        | 24 | 1  |
| ENSMUSG00000030435.9  | U2af2         | 0.032282        | 24 | 14 |
| ENSMUSG00000031299.10 | Pdha1         | 0.032282        | 24 | 1  |
| ENSMUSG00000030058.11 | Copg1         | 0.032282        | 24 | 2  |
| ENSMUSG0000002257.7   | Def6          | 0.032282        | 24 | 14 |
| ENSMUSG00000049421.7  | Zfp260        | 0.032282        | 24 | 2  |
| ENSMUSG00000034902.11 | Pip5k1c       | 0.032282        | 24 | 12 |
| ENSMUSG00000041220.6  | Elovl6        | 0.032282        | 24 | 3  |
| ENSMUSG00000021748.8  | Pdhb          | 0.032282        | 24 | 2  |
| ENSMUSG00000030245.10 | Golt1b        | 0.032282        | 24 | 4  |
| ENSMUSG00000049760.5  | 2410015M20Rik | 0.032282        | 24 | 4  |
| ENSMUSG00000039100.9  |               | Mar-06 0.032282 | 24 | 2  |
| ENSMUSG00000014444.10 | Piezo1        | 0.032282        | 24 | 8  |
| ENSMUSG00000031770.9  | Herpud1       | 0.032282        | 24 | 22 |
| ENSMUSG00000022893.8  | Adamts1       | 0.032282        | 24 | 2  |
| ENSMUSG00000032116.11 | Stt3a         | 0.032282        | 24 | 2  |
| ENSMUSG00000037049.8  | Smpd1         | 0.032282        | 24 | 2  |
| ENSMUSG00000054690.11 | Emcn          | 0.032282        | 24 | 3  |
| ENSMUSG00000028150.8  | Rorc          | 0.032282        | 24 | 2  |
| ENSMUSG00000025511.8  | Tspan4        | 0.032282        | 24 | 22 |
| ENSMUSG00000029776.10 | Hibadh        | 0.032282        | 24 | 1  |
| ENSMUSG00000032563.9  | Mrpl3         | 0.032282        | 24 | 3  |
| ENSMUSG00000090266.4  | Mettl23       | 0.032282        | 24 | 3  |
| ENSMUSG00000026077.9  | Npas2         | 0.032282        | 24 | 8  |
| ENSMUSG00000025239.2  | Limd1         | 0.032282        | 24 | 0  |
| ENSMUSG00000017686.10 | Rhot1         | 0.032282        | 24 | 2  |
| ENSMUSG00000021395.10 | Spin1         | 0.032282        | 24 | 1  |
| ENSMUSG00000028149.6  | Rap1gds1      | 0.032282        | 24 | 1  |

|                        |          |          |    |    |
|------------------------|----------|----------|----|----|
| ENSMUSG00000038991.10  | Txndc5   | 0.032282 | 24 | 2  |
| ENSMUSG000000091512.1  | Lamtor3  | 0.032282 | 24 | 2  |
| ENSMUSG00000002017.9   | Fam98a   | 0.032282 | 24 | 2  |
| ENSMUSG000000032353.7  | Tmed3    | 0.032282 | 24 | 2  |
| ENSMUSG000000055319.7  | Sec23ip  | 0.032282 | 24 | 0  |
| ENSMUSG000000043252.8  | Tmem64   | 0.032282 | 24 | 2  |
| ENSMUSG000000063001.8  | Rps23-ps | 0.032282 | 24 | 0  |
| ENSMUSG000000027367.10 | Stard7   | 0.032282 | 24 | 0  |
| ENSMUSG000000034064.8  | Poglut1  | 0.032282 | 24 | 4  |
| ENSMUSG00000002210.5   | Smg9     | 0.032282 | 24 | 12 |
| ENSMUSG000000095115.1  | Itpripl2 | 0.032282 | 24 | 3  |
| ENSMUSG000000016481.10 | Cr1l     | 0.032282 | 24 | 0  |
| ENSMUSG000000040374.7  | Pex2     | 0.032282 | 24 | 3  |
| ENSMUSG000000002949.8  | Timm44   | 0.032282 | 24 | 4  |
| ENSMUSG000000020114.6  | Cand1    | 0.032282 | 24 | 0  |
| ENSMUSG000000024269.5  | Tpgs2    | 0.032282 | 24 | 3  |
| ENSMUSG000000097971.2  | Gm26917  | 0.032282 | 24 | 10 |
| ENSMUSG000000020963.8  | Tshr     | 0.032282 | 24 | 4  |
| ENSMUSG000000036334.7  | Igsf10   | 0.032282 | 24 | 4  |
| ENSMUSG000000036782.7  | Klhl13   | 0.032282 | 24 | 4  |
| ENSMUSG000000001098.9  | Kctd10   | 0.032282 | 24 | 2  |
| ENSMUSG000000019874.5  | Fabp7    | 0.032282 | 24 | 6  |
| ENSMUSG000000030203.11 | Dusp16   | 0.032282 | 24 | 0  |
| ENSMUSG000000059689.8  | Zfp637   | 0.032282 | 24 | 4  |
| ENSMUSG000000037613.9  | Tnfrsf23 | 0.032282 | 24 | 8  |
| ENSMUSG000000027519.4  | Rab22a   | 0.032282 | 24 | 3  |
| ENSMUSG000000024778.6  | Fas      | 0.032282 | 24 | 4  |
| ENSMUSG000000035459.9  | Stab2    | 0.032282 | 24 | 16 |
| ENSMUSG000000020623.5  | Map2k6   | 0.032282 | 24 | 20 |
| ENSMUSG000000032705.8  | Exd2     | 0.032282 | 24 | 1  |
| ENSMUSG000000040659.3  | Efhd2    | 0.032282 | 24 | 14 |
| ENSMUSG000000048376.5  | F2r      | 0.032282 | 24 | 4  |
| ENSMUSG000000036646.7  | Man1b1   | 0.032282 | 24 | 0  |
| ENSMUSG000000026608.7  | Kctd3    | 0.032282 | 24 | 4  |
| ENSMUSG000000025241.9  | Fyco1    | 0.032282 | 24 | 2  |
| ENSMUSG000000025144.11 | Stra13   | 0.032282 | 24 | 12 |
| ENSMUSG000000034263.6  | Vwa9     | 0.032282 | 24 | 4  |
| ENSMUSG000000034300.10 | Fam53c   | 0.032282 | 24 | 1  |
| ENSMUSG000000067369.6  | Trmt2b   | 0.032282 | 24 | 0  |
| ENSMUSG000000066150.6  | Slc31a1  | 0.032282 | 24 | 3  |
| ENSMUSG000000017724.8  | Etv4     | 0.032282 | 24 | 6  |
| ENSMUSG000000028184.8  | Lphn2    | 0.032282 | 24 | 5  |
| ENSMUSG000000096173.1  | Gm3150   | 0.032282 | 24 | 4  |
| ENSMUSG000000015806.6  | Qdpr     | 0.032282 | 24 | 0  |
| ENSMUSG000000029125.8  | Stx18    | 0.032282 | 24 | 4  |
| ENSMUSG000000047777.9  | Phf13    | 0.032282 | 24 | 2  |
| ENSMUSG000000046532.7  | Ar       | 0.032282 | 24 | 0  |
| ENSMUSG000000038764.8  | Ptpn3    | 0.032282 | 24 | 0  |
| ENSMUSG000000039476.7  | Prrx2    | 0.032282 | 24 | 5  |
| ENSMUSG000000036932.8  | Aifm1    | 0.032282 | 24 | 4  |

|                       |               |          |    |    |
|-----------------------|---------------|----------|----|----|
| ENSMUSG00000052504.6  | Epha3         | 0.032282 | 24 | 4  |
| ENSMUSG00000087635.2  | Gm13414       | 0.032282 | 24 | 16 |
| ENSMUSG00000037762.6  | Slc16a9       | 0.032282 | 24 | 6  |
| ENSMUSG00000005907.8  | Pex1          | 0.032282 | 24 | 3  |
| ENSMUSG00000028024.8  | Enpep         | 0.032282 | 24 | 8  |
| ENSMUSG00000029815.7  | Malsu1        | 0.032282 | 24 | 0  |
| ENSMUSG00000064105.6  | Cnm2          | 0.032282 | 24 | 4  |
| ENSMUSG00000028621.11 | Cyb5rl        | 0.032282 | 24 | 4  |
| ENSMUSG00000028152.4  | Tspan5        | 0.032282 | 24 | 0  |
| ENSMUSG00000070000.7  | Fcho1         | 0.032282 | 24 | 14 |
| ENSMUSG00000038816.8  | Ctnnal1       | 0.032282 | 24 | 2  |
| ENSMUSG00000039633.6  | Lonrf1        | 0.032282 | 24 | 0  |
| ENSMUSG00000032401.9  | Lctl          | 0.032282 | 24 | 4  |
| ENSMUSG00000026810.6  | Dpm2          | 0.032282 | 24 | 8  |
| ENSMUSG00000024277.8  | Mapre2        | 0.032282 | 24 | 2  |
| ENSMUSG00000036186.5  | Fam69b        | 0.032282 | 24 | 4  |
| ENSMUSG00000005225.9  | Plekha8       | 0.032282 | 24 | 2  |
| ENSMUSG00000029576.11 | Radil         | 0.032282 | 24 | 4  |
| ENSMUSG00000021646.8  | Mccc2         | 0.032282 | 24 | 8  |
| ENSMUSG00000024780.6  | Cdc37l1       | 0.032282 | 24 | 2  |
| ENSMUSG00000000148.11 | Brat1         | 0.032282 | 24 | 4  |
| ENSMUSG00000041406.8  | BC055324      | 0.032282 | 24 | 16 |
| ENSMUSG00000042487.5  | Leo1          | 0.032282 | 24 | 6  |
| ENSMUSG00000030763.6  | Lcmt1         | 0.032282 | 24 | 22 |
| ENSMUSG00000045410.11 | Akr1e1        | 0.032282 | 24 | 2  |
| ENSMUSG00000093392.1  | Gm6061        | 0.032282 | 24 | 20 |
| ENSMUSG00000029536.7  | Gatc          | 0.032282 | 24 | 3  |
| ENSMUSG00000017400.4  | Stac2         | 0.032282 | 24 | 12 |
| ENSMUSG00000030722.7  | Nfatc2ip      | 0.032282 | 24 | 16 |
| ENSMUSG00000044715.6  | Gskip         | 0.032282 | 24 | 4  |
| ENSMUSG00000093548.1  | Gm6407        | 0.032282 | 24 | 15 |
| ENSMUSG00000012126.10 | Ubxn11        | 0.032282 | 24 | 11 |
| ENSMUSG00000041650.9  | Pcca          | 0.032282 | 24 | 1  |
| ENSMUSG00000080875.2  | Gm7332        | 0.032282 | 24 | 14 |
| ENSMUSG00000031111.10 | Igsf1         | 0.032282 | 24 | 6  |
| ENSMUSG00000089764.1  | Gm16580       | 0.032282 | 24 | 16 |
| ENSMUSG00000071291.4  | Zfp58         | 0.032282 | 24 | 6  |
| ENSMUSG00000044636.5  | Csrnp2        | 0.032282 | 24 | 4  |
| ENSMUSG00000043122.6  | A530016L24Rik | 0.032282 | 24 | 2  |
| ENSMUSG00000095675.1  | Ccl21b        | 0.032282 | 24 | 5  |
| ENSMUSG00000040164.3  | Kcns1         | 0.032282 | 24 | 5  |
| ENSMUSG00000037463.8  | Fbxo27        | 0.032282 | 24 | 2  |
| ENSMUSG00000022371.9  | Col14a1       | 0.032282 | 24 | 2  |
| ENSMUSG00000075318.6  | Scn2a1        | 0.032282 | 24 | 5  |
| ENSMUSG00000044122.8  | Proca1        | 0.032282 | 24 | 2  |
| ENSMUSG00000042505.6  | Acn9          | 0.032282 | 24 | 2  |
| ENSMUSG00000014782.9  | Plekhg4       | 0.032282 | 24 | 8  |
| ENSMUSG00000085738.2  | Gm12335       | 0.032282 | 24 | 0  |
| ENSMUSG00000046561.8  | Arsj          | 0.032282 | 24 | 4  |
| ENSMUSG00000028102.9  | Pex11b        | 0.032282 | 24 | 2  |

|                       |               |          |    |    |
|-----------------------|---------------|----------|----|----|
| ENSMUSG00000086679.1  | Gm15551       | 0.032282 | 24 | 2  |
| ENSMUSG00000037418.5  | Best1         | 0.032282 | 24 | 4  |
| ENSMUSG00000018500.2  | Adora2b       | 0.032282 | 24 | 3  |
| ENSMUSG000000091613.1 | Gm17046       | 0.032282 | 24 | 4  |
| ENSMUSG00000031482.8  | Slc25a15      | 0.032282 | 24 | 0  |
| ENSMUSG00000002083.6  | Bbc3          | 0.032282 | 24 | 10 |
| ENSMUSG000000070713.4 | Gm10282       | 0.032282 | 24 | 14 |
| ENSMUSG00000020396.8  | Nefh          | 0.032282 | 24 | 16 |
| ENSMUSG00000032593.5  | Amigo3        | 0.032282 | 24 | 6  |
| ENSMUSG00000047747.9  | Rnf150        | 0.032282 | 24 | 20 |
| ENSMUSG00000038583.6  | Pln           | 0.032282 | 24 | 4  |
| ENSMUSG00000042401.6  | Crtac1        | 0.032282 | 24 | 14 |
| ENSMUSG00000098495.1  | RP24-113D21.1 | 0.032282 | 24 | 14 |
| ENSMUSG00000047497.9  | Adamts12      | 0.032282 | 24 | 0  |
| ENSMUSG00000057157.3  | Gm6054        | 0.032282 | 24 | 4  |
| ENSMUSG00000092454.1  | Gm2991        | 0.032282 | 24 | 14 |
| ENSMUSG00000015002.10 | Efr3a         | 0.032282 | 24 | 4  |
| ENSMUSG00000028597.11 | Gpx7          | 0.032282 | 24 | 2  |
| ENSMUSG00000098198.1  | Gm9169        | 0.032282 | 24 | 16 |
| ENSMUSG00000079157.3  | Fam155a       | 0.032282 | 24 | 0  |
| ENSMUSG00000020599.7  | Rgs9          | 0.032282 | 24 | 4  |
| ENSMUSG00000097554.1  | Gm26825       | 0.032282 | 24 | 22 |
| ENSMUSG00000074398.5  | Gm15441       | 0.032282 | 24 | 15 |
| ENSMUSG00000095724.1  | Gm21319       | 0.032282 | 24 | 20 |
| ENSMUSG00000098985.1  | RP24-570C10.6 | 0.032282 | 24 | 19 |
| ENSMUSG00000081540.3  | Gm12538       | 0.032282 | 24 | 3  |
| ENSMUSG00000068165.2  | Gm10233       | 0.032282 | 24 | 3  |
| ENSMUSG00000005360.8  | Slc1a3        | 0.032282 | 24 | 4  |
| ENSMUSG00000062794.8  | Zfp599        | 0.032282 | 24 | 12 |
| ENSMUSG00000066270.2  | Gm10157       | 0.032282 | 24 | 22 |
| ENSMUSG00000045062.3  | Pcdhb7        | 0.032282 | 24 | 6  |
| ENSMUSG00000087433.1  | Gm14167       | 0.032282 | 24 | 12 |
| ENSMUSG00000081289.1  | Gm14857       | 0.032282 | 24 | 15 |
| ENSMUSG00000047307.1  | Pcdhb13       | 0.032282 | 24 | 4  |
| ENSMUSG00000027547.11 | Sall4         | 0.032282 | 24 | 17 |
| ENSMUSG00000086884.1  | Gm16225       | 0.032282 | 24 | 16 |
| ENSMUSG00000080775.1  | Gm6368        | 0.032282 | 24 | 18 |
| ENSMUSG00000033405.3  | Nudt15        | 0.032282 | 24 | 3  |
| ENSMUSG00000040904.4  | Gm21988       | 0.032282 | 24 | 13 |
| ENSMUSG00000029608.7  | Rph3a         | 0.032282 | 24 | 17 |
| ENSMUSG00000003410.7  | Elavl3        | 0.032282 | 24 | 16 |
| ENSMUSG00000062257.6  | Opcml         | 0.032282 | 24 | 4  |
| ENSMUSG00000035211.8  | Xrra1         | 0.032282 | 24 | 6  |
| ENSMUSG00000094248.1  | Hist1h2ao     | 0.032282 | 24 | 15 |
| ENSMUSG00000078087.4  | Rps12l1       | 0.032282 | 24 | 22 |
| ENSMUSG00000070271.5  | Gm13268       | 0.032282 | 24 | 16 |
| ENSMUSG00000062417.5  | Hist1h3g      | 0.032282 | 24 | 12 |
| ENSMUSG00000057626.1  | Gm5621        | 0.032282 | 24 | 0  |
| ENSMUSG00000082163.1  | Gm14276       | 0.032282 | 24 | 12 |
| ENSMUSG00000031995.2  | St14          | 0.032282 | 24 | 16 |

|                      |               |          |    |    |
|----------------------|---------------|----------|----|----|
| ENSMUSG00000022144.3 | Gdnf          | 0.042414 | 24 | 6  |
| ENSMUSG00000030307.7 | Slc6a11       | 0.042414 | 24 | 16 |
| ENSMUSG00000009214.3 | Tmem8c        | 0.042414 | 24 | 6  |
| ENSMUSG00000034584.3 | Exph5         | 0.042414 | 24 | 6  |
| ENSMUSG00000044081.7 | 4930441O14Rik | 0.042414 | 24 | 6  |
| ENSMUSG00000036264.9 | Fstl4         | 0.042414 | 24 | 18 |
| ENSMUSG00000031376.9 | Atp2b3        | 0.042414 | 24 | 5  |
| ENSMUSG00000097760.1 | 6030442K20Rik | 0.042414 | 24 | 4  |
